# Supplementary material for: ZnSnO3 or Zn2SnO4/SnO2 Hierarchical Material? Insight into the Formation of ZnSn(OH)6 Derived Oxides
Source: MDPI journal article supplement (doi:10.3390/inorganics10110183), 2022-10-26
Supplement: s1 [file s1]

# ZnSnO<sub>3</sub> or Zn<sub>2</sub>SnO<sub>4</sub>/SnO<sub>2</sub> Hierarchical Material? Insight into the Formation of ZnSn(OH)<sub>6</sub> Derived Oxides

## ELECTRONIC SUPPLEMENTARY INFORMATION

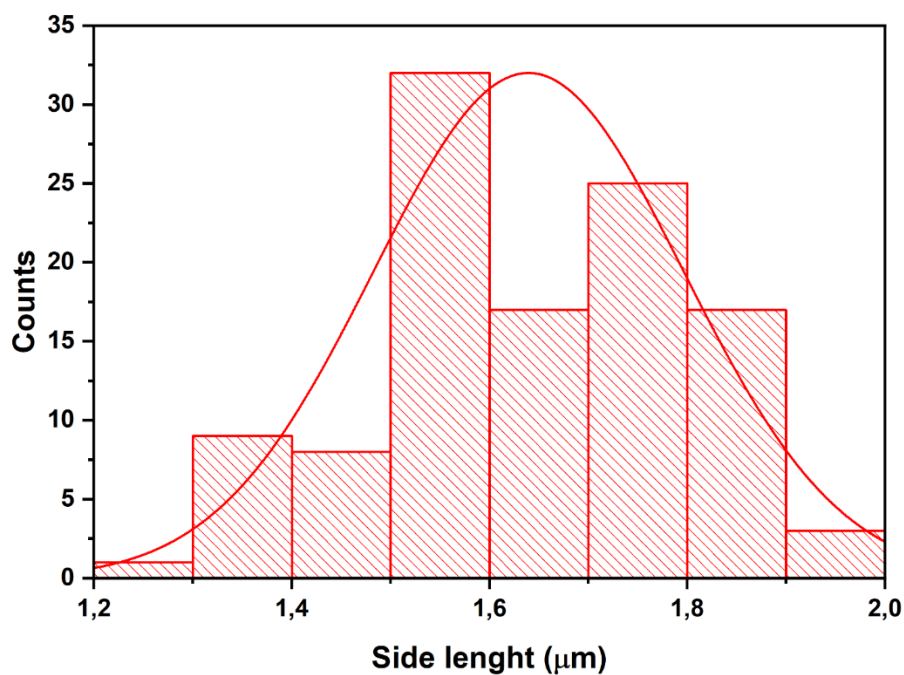

Figure S1. Size length distribution of ZnSn(OH)<sub>6</sub> microcubes.

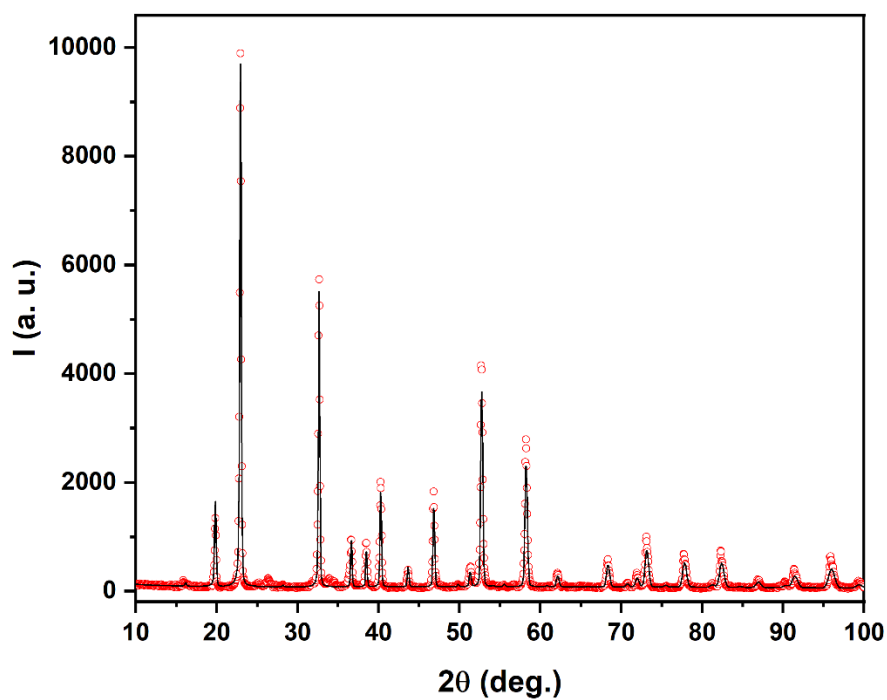

Figure S2. Rietveld refinement of ZnSn(OH)<sub>6</sub>.

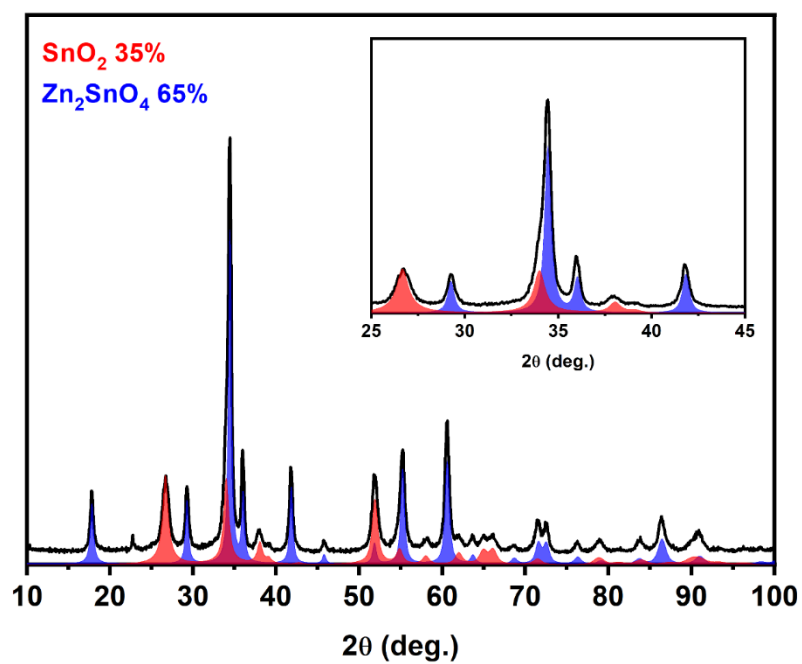

Figure S3 - XRD pattern comparison for product treated at  $750^\circ\text{C}$  with  $\text{SnO}_2$  and  $\text{Zn}_2\text{SnO}_4$ .

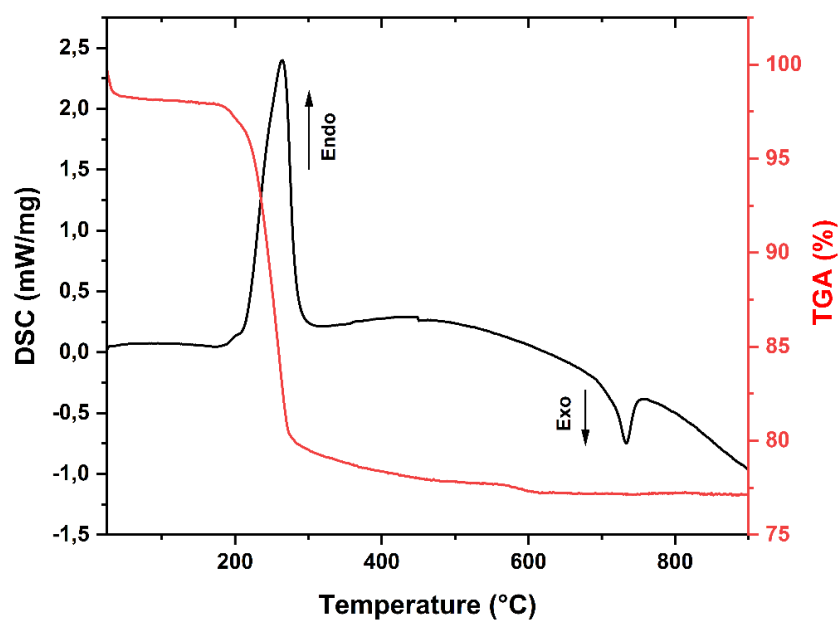

Figure S4. TG-DSC curves performed on  $\text{ZnSn}(\text{OH})_6$  microcubes.

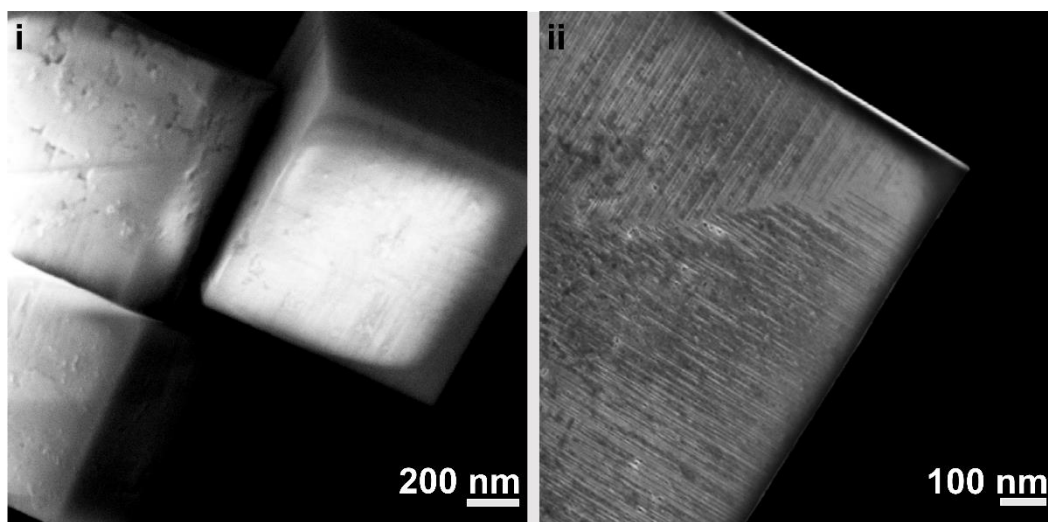

**Figure S5.** - SEM images of ZnSn(OH)<sub>6</sub> microcubes, scale bars: i 200 nm and ii 100 nm.

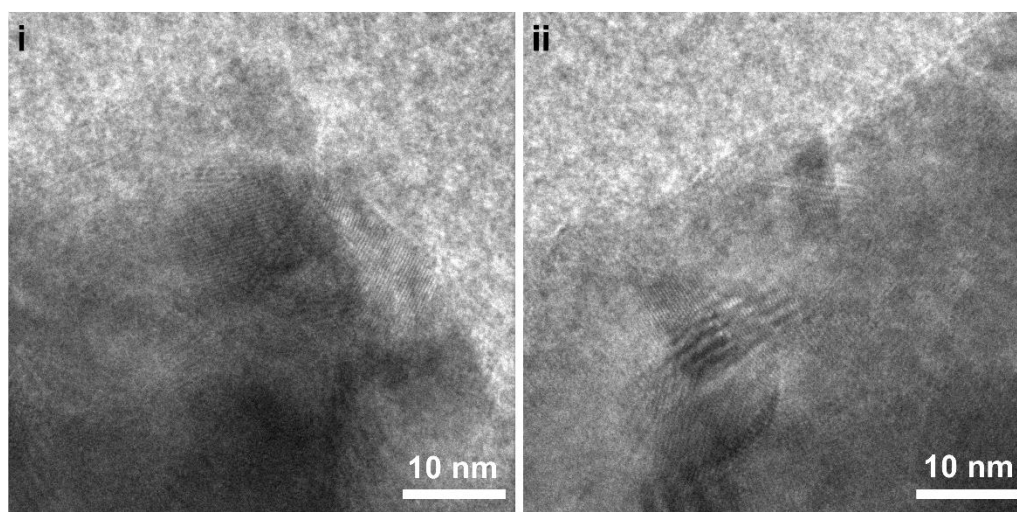

**Figure S6.** - TEM image of the surface of the particles treated at 750 °C, scale bars 10 nm.
